# Supplementary material
Source: PubMed Central journal article supplement (PMC9315987)
Supplement: jamainternmed-e222947-s003.pdf [file jamainternmed-e222947-s003.pdf]

## Data Sharing Statement

Crowley. Effect of a Comprehensive Telehealth Intervention vs Telemonitoring and Care Coordination in Patients With Persistently Poor Type 2 Diabetes Control. *JAMA Intern Med*. Published July 25, 2022. doi:10.1001/jamainternmed.2022.2947

### Data

**Data available:** Yes

**Data types:** Deidentified participant data, Data dictionary

**How to access data:** For requests consistent with Veterans Affairs policy, data may be made available via inquiry to Matthew Crowley, MD ([matthew.crowley@duke.edu](mailto:matthew.crowley@duke.edu)).

**When available:** With publication

### Supporting Documents

**Document types:** Statistical/analytic code

**How to access documents:** For requests consistent with Veterans Affairs policy, statistical code may be made available via inquiry to Matthew Crowley, MD ([matthew.crowley@duke.edu](mailto:matthew.crowley@duke.edu)).

**When available:** With publication

### Additional Information

**Who can access the data:** Anyone requesting the data in a manner consistent with Veterans Affairs policy.

**Types of analyses:** Any purpose consistent with Veterans Affairs policy.

**Mechanisms of data availability:** Via agreement consistent with Veterans Affairs policy.

**Any additional restrictions:** Any sharing of data is subject to Veterans Affairs policy.
